# Supplementary material for: Topological insulators based on 2D shape-persistent organic ligand complexes
Source: Royal Society of Chemistry journal article supplement (doi:10.1039/c4nr05247a), 2014-11-19
Supplement: c4nr05247a1.pdf [file c4nr05247a1.pdf]

## Supporting Information

### Topological Insulators based on 2D Shape-persistent Organic Ligand Complexes

Qionghua Zhou<sup>1</sup>, Jinlan Wang<sup>1\*</sup>, Tsz Sian Chwee<sup>2</sup>, Wu Gang<sup>2</sup>, Xiaobai Wang<sup>3</sup>, Qun Ye<sup>3</sup>, Jianwei Xu<sup>3,4</sup>, Shuo-Wang Yang<sup>2†</sup>

Corresponding: [jlwang@seu.edu.cn](mailto:jlwang@seu.edu.cn) and [yangsw@ihpc.a-star.edu.sg](mailto:yangsw@ihpc.a-star.edu.sg)

<sup>1</sup>Department of Physics, Southeast University, Nanjing 211189, P. R. China

<sup>2</sup>Institute of High Performance Computing (IHPC), Agency for Science, Technology and Research (A\*STAR), 1 Fusionopolis Way, #16-16 Connexis, Singapore 138632, Republic of Singapore

<sup>3</sup>Institute of Materials Research and Engineering (IMRE), Agency for Science, Technology and Research (A\*STAR), 3 Research Link, Singapore 11760, Republic of Singapore

<sup>4</sup>Department of Chemistry, National University of Singapore, 3 Science Drive 3, Singapore 117543, Republic of Singapore

**Table S1** The energy differences between *cis*- and *trans*-structures.

| Complex                | $\Delta E = E_{\text{cis}} - E_{\text{trans}}$ (eV/unit cell) |
|------------------------|---------------------------------------------------------------|
| Pd-(NH <sub>2</sub> )S | 1.28                                                          |
| Pt-(NH <sub>2</sub> )S | 1.44                                                          |
| Pd-(NH <sub>2</sub> )O | 2.50                                                          |
| Pt-(NH <sub>2</sub> )O | 2.40                                                          |
| Pd-(NH)S               | 0.03                                                          |
| Pt-(NH)S               | 0.19                                                          |

**Table S2** The lattice constant (a) and Pd/Pt-N distance (d) in each *trans*-complex.

| Complex                              | a / Å | d / Å |
|--------------------------------------|-------|-------|
| <i>trans</i> -Pd-(NH <sub>2</sub> )S | 23.15 | 2.073 |
| <i>trans</i> -Pt-(NH <sub>2</sub> )S | 23.14 | 2.063 |
| <i>trans</i> -Pd-(NH <sub>2</sub> )O | 22.35 | 2.062 |
| <i>trans</i> -Pt-(NH <sub>2</sub> )O | 22.37 | 2.051 |
| <i>trans</i> -Pd-(NH)S               | 22.94 | 1.977 |
| <i>trans</i> -Pt-(NH)S               | 22.95 | 1.968 |
| <i>trans</i> -Pd-(NH)O               | 22.24 | 1.969 |
| <i>trans</i> -Pt-(NH)O               | 22.27 | 1.954 |

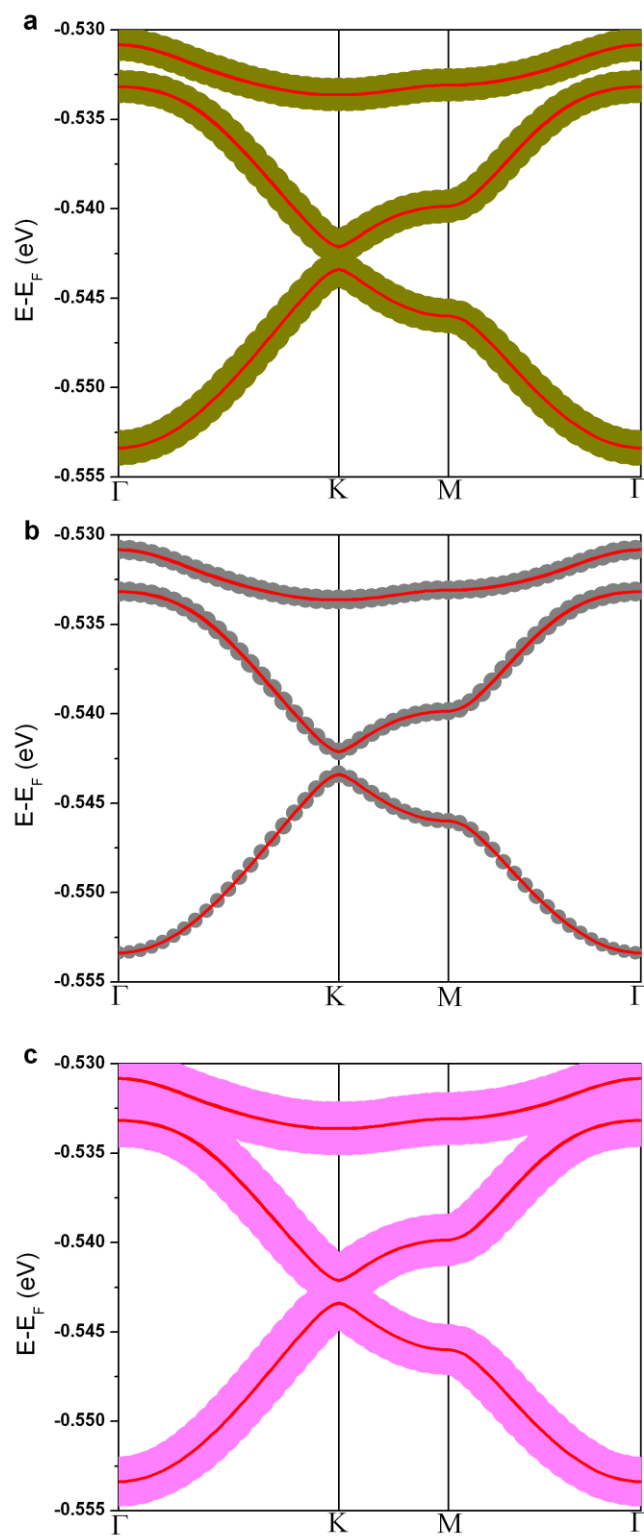

**Fig. S1** (a) – (c) The occupancies of  $p$ -orbital components from S (yellow), C (grey) and the sum of them (pink) in three topmost kagome bands in 2D *trans*-Pd-(NH<sub>2</sub>)S complex.

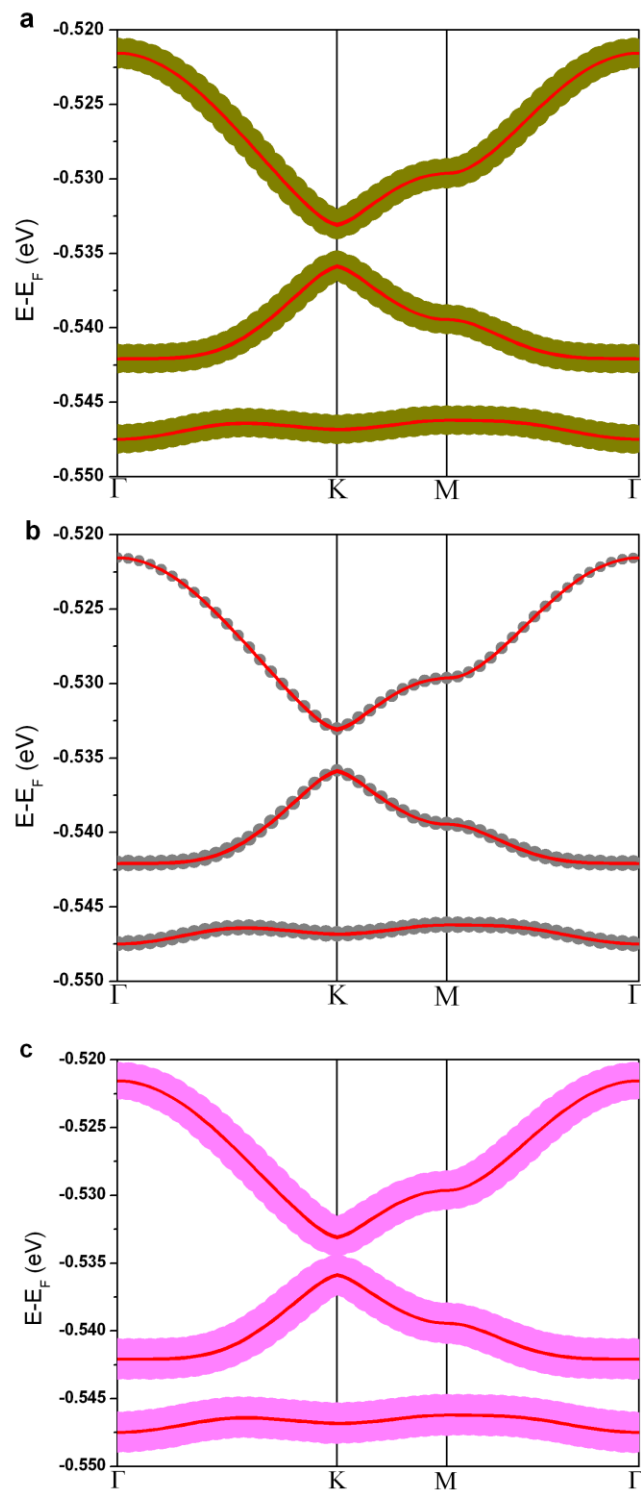

**Fig. S2** (a) – (c) The occupancies of  $p$ -orbital components from S, C atoms and the sum of them in three topmost kagome bands in 2D *trans*-Pt-(NH<sub>2</sub>)S complex.

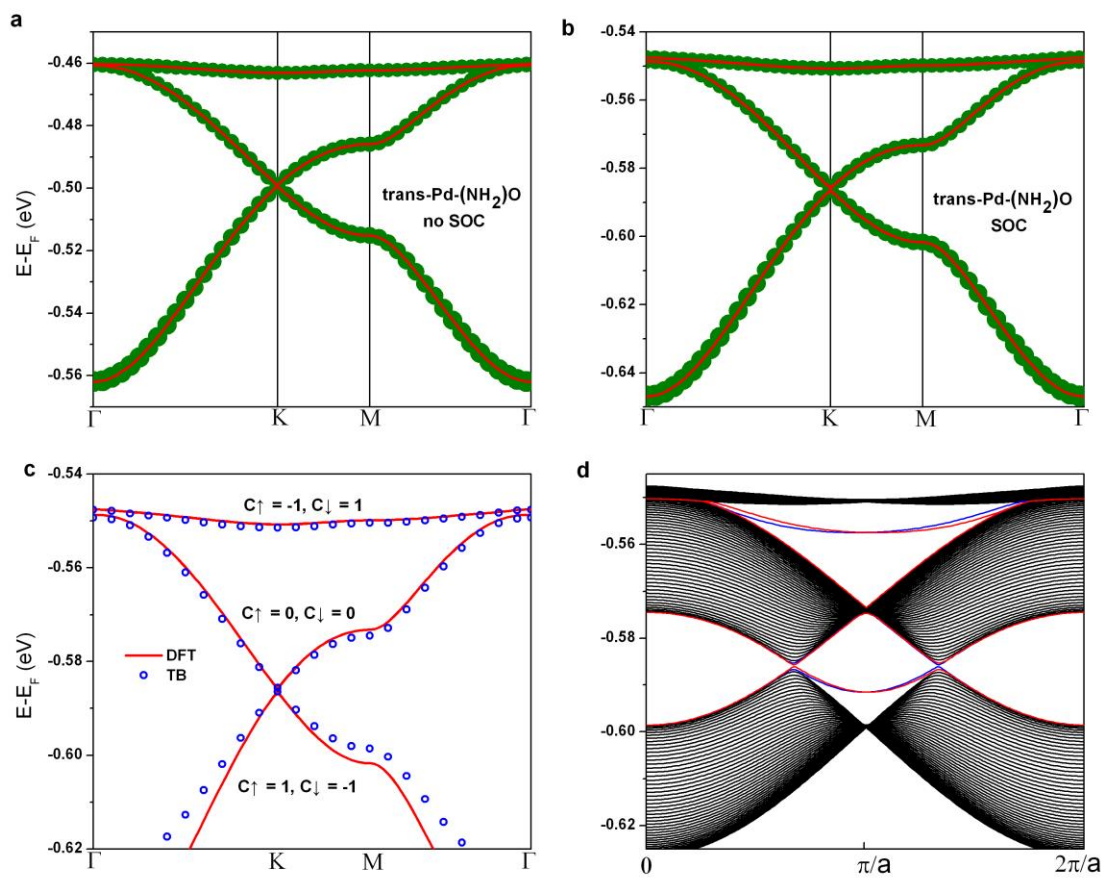

**Fig. S3** DFT calculated band structures of *trans*-Pd-(NH<sub>2</sub>)O (a) without and (b) with SOC consideration as well as *d*-orbital occupancies; (c) comparison between DFT and TB calculated band structures; (d) edge states for both up and down spins.

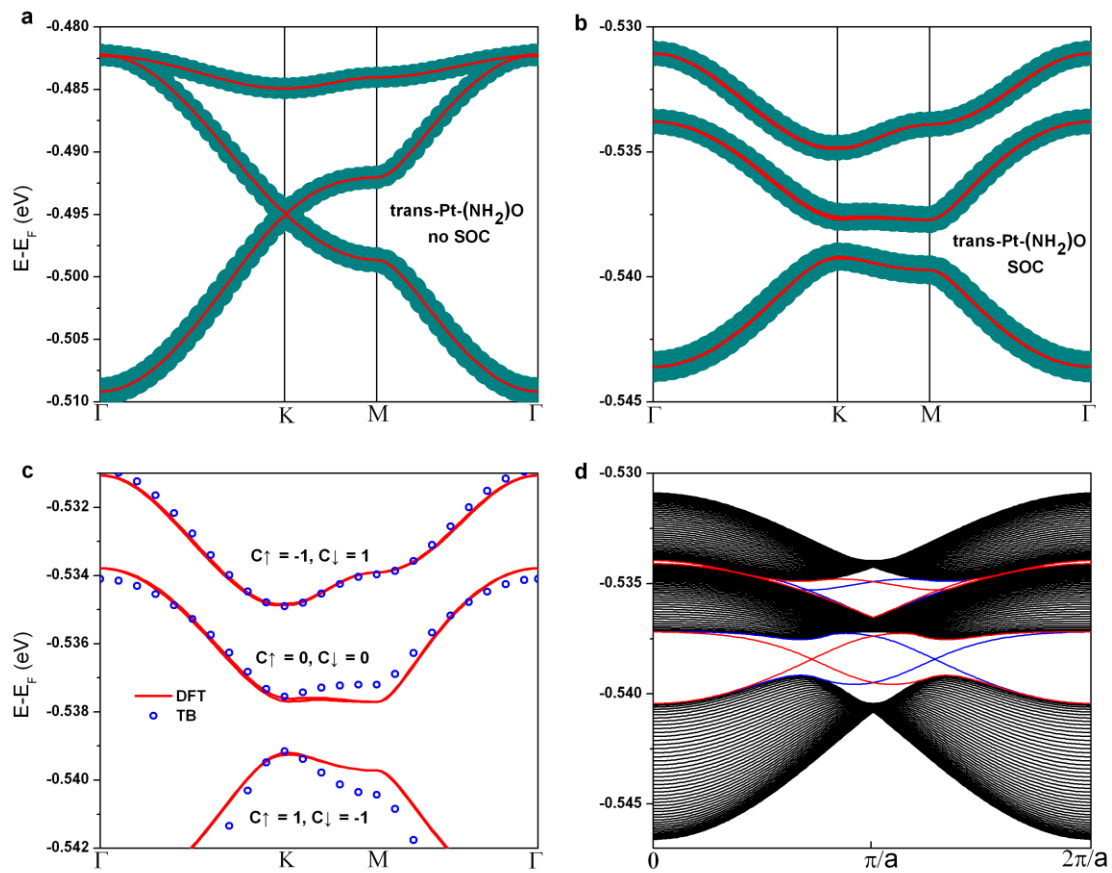

**Fig. S4** DFT calculated band structures of *trans*-Pt-(NH<sub>2</sub>)O (a) without and (b) with SOC consideration as well as  $d$ -orbital occupancies; (c) comparison between DFT and TB calculated band structures; (d) edge states for both up and down spins.



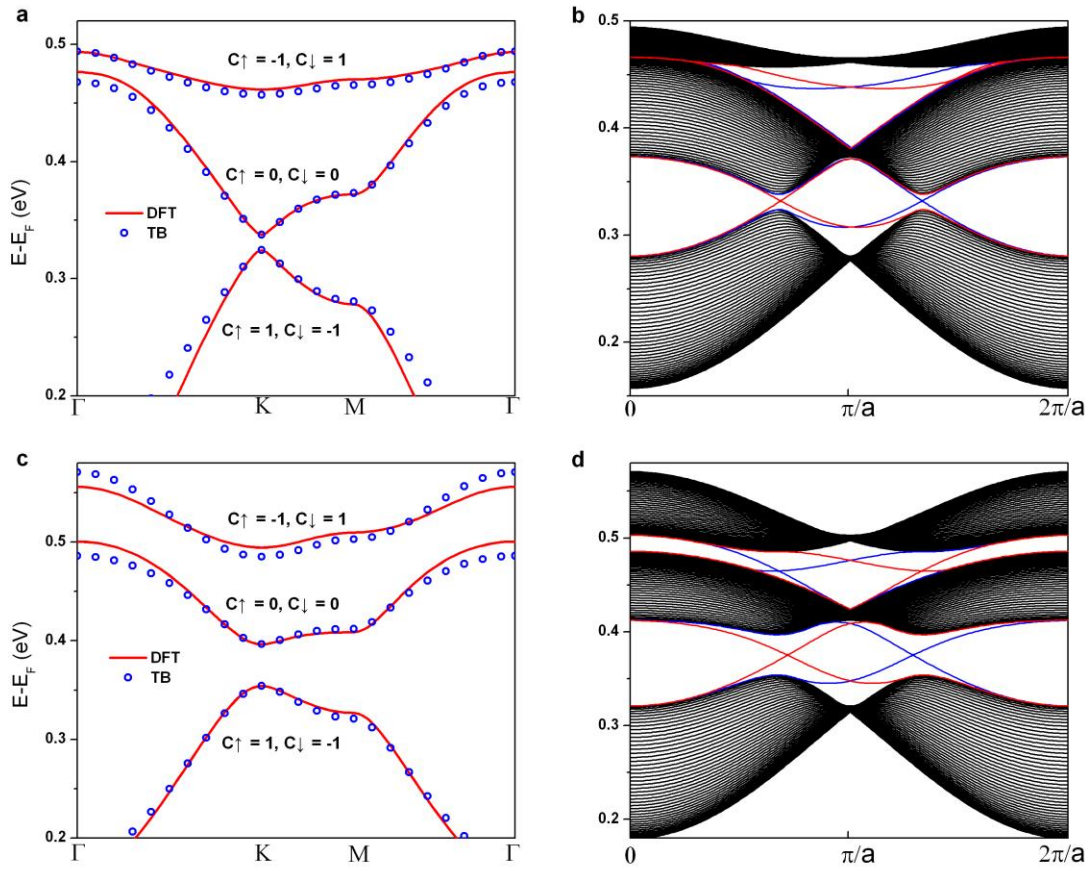

**Fig. S5** (a) Comparison between DFT and TB calculated band structures with SOC considerations for *trans*-Pd-(NH)S; and (b) edge states for both up and down spins. The calculated  $Z_2$  invariants are equal to 1 in both gaps. (c) and (d) are for *trans*-Pt-(NH)S.



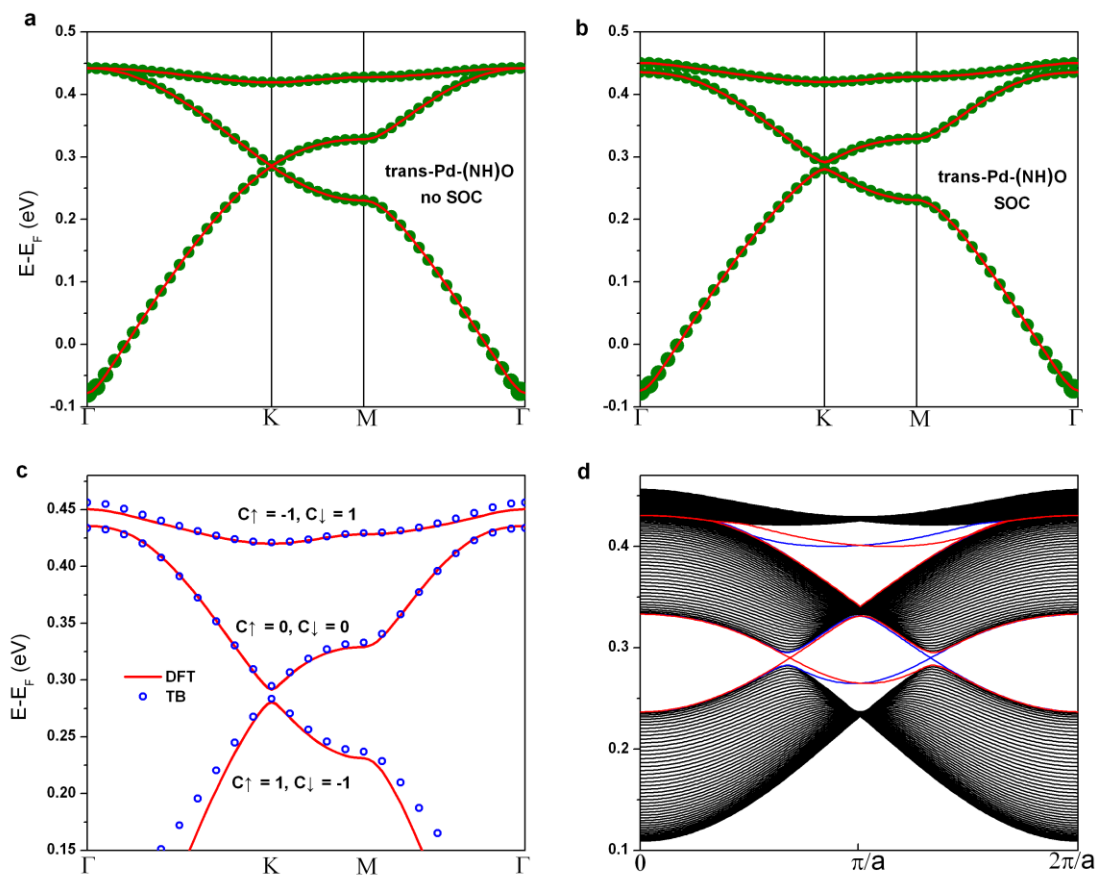

**Fig. S6** (a) & (b) DFT calculated band structures of *trans*-Pd-(NH)O without and with SOC considerations; (c) comparison between DFT and TB calculated band structures; and (d) edge states for both spins.  $Z_2$  invariants are calculated to 1 in both gaps.

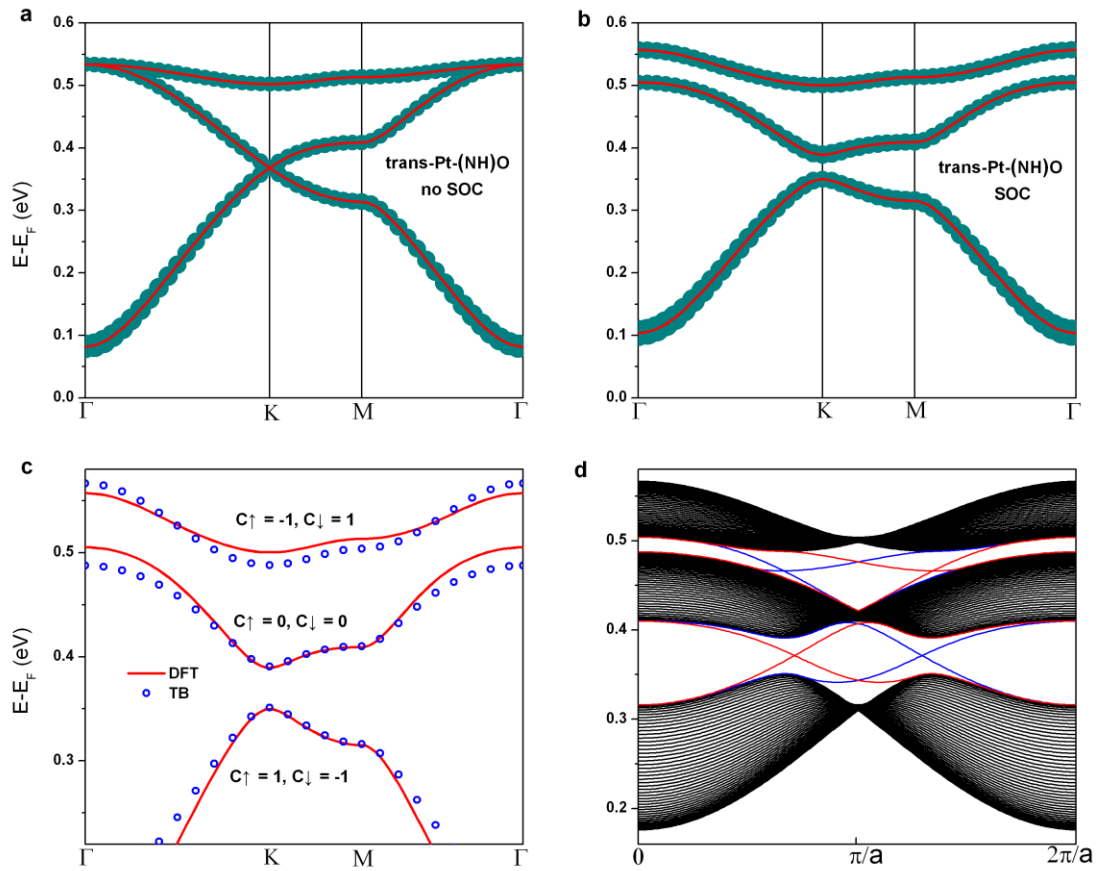

**Fig. S7** (a) & (b) DFT calculated band structures of *trans*-Pt-(NH)O without and with SOC considerations; (c) comparison between DFT and TB calculated band structures; and (d) edge states for both spins.  $Z_2$  invariants are calculated to be 1 in both gaps.

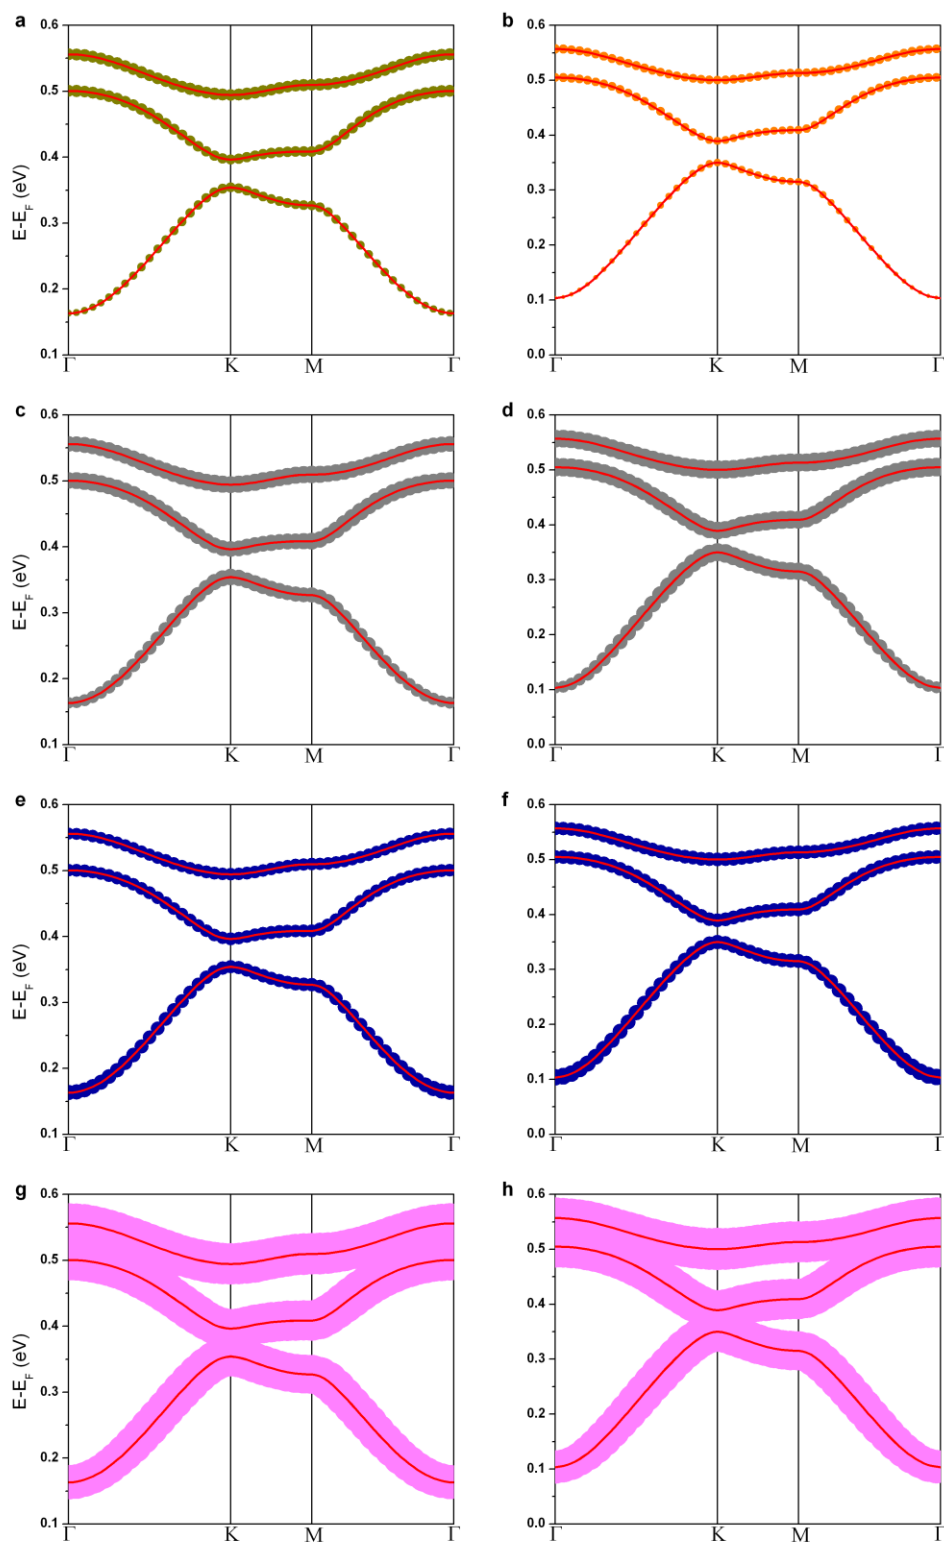

**Fig. S8**  $p$ -orbital occupancies from S/O, C, N atoms and sum of them for *trans*-Pt-(NH)S (a, c, e, g) and for *trans*-Pt-(NH)O (b, d, f, h).

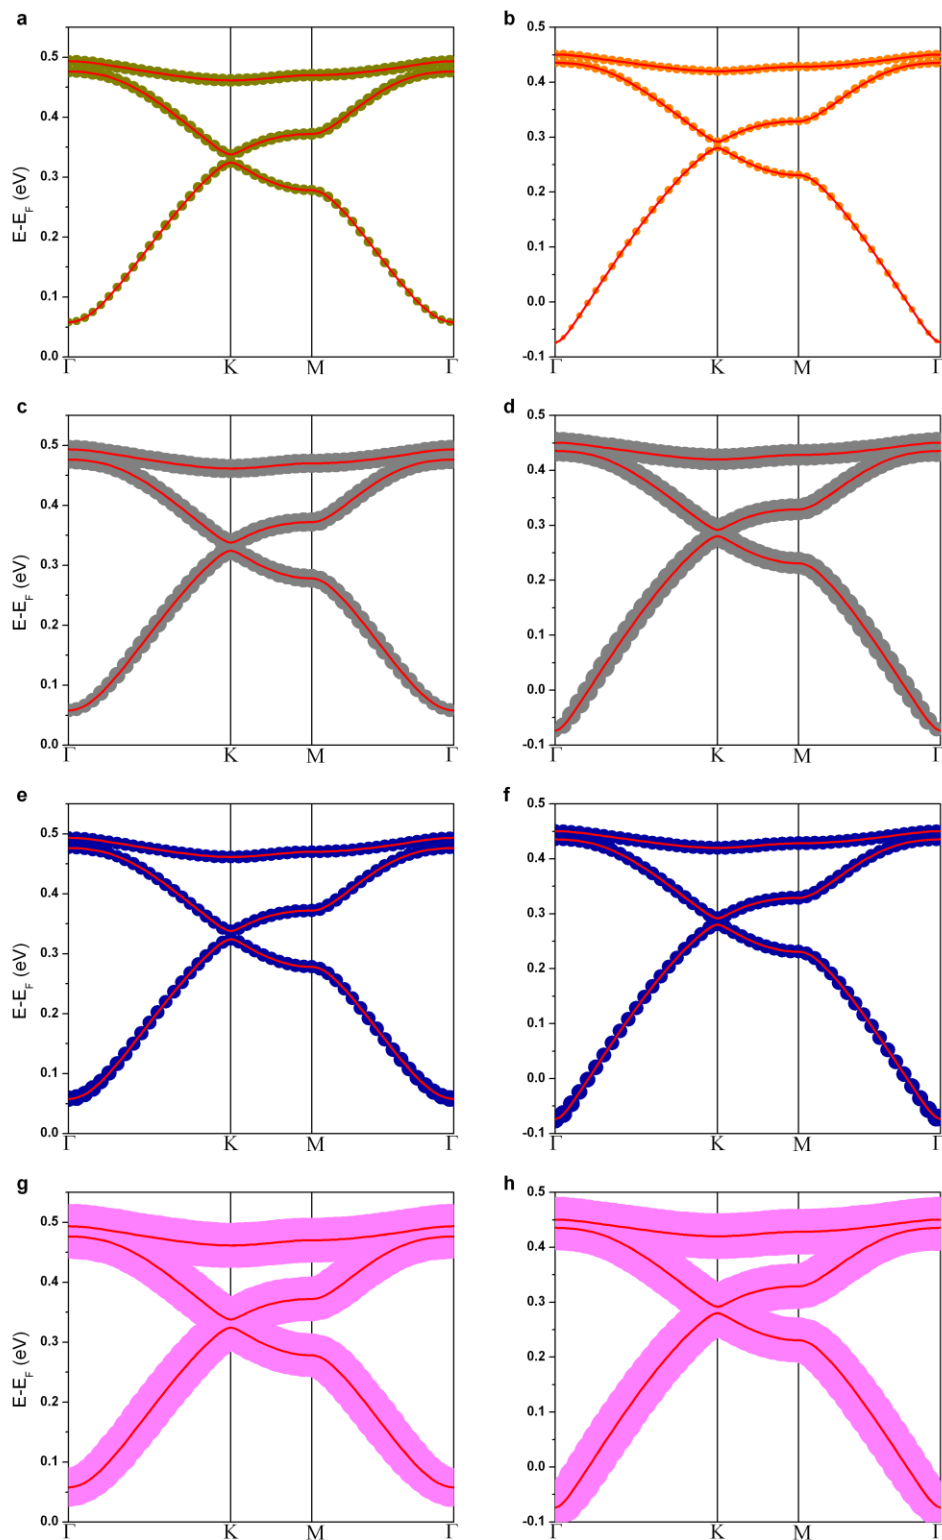

**Fig. S9** *p*-orbital occupancies from S/O, C, N atoms and sum of them for *trans*-Pd-(NH)S (a, c, e, g) and *trans*-Pd-(NH)O (b, d, f, h) respectively.

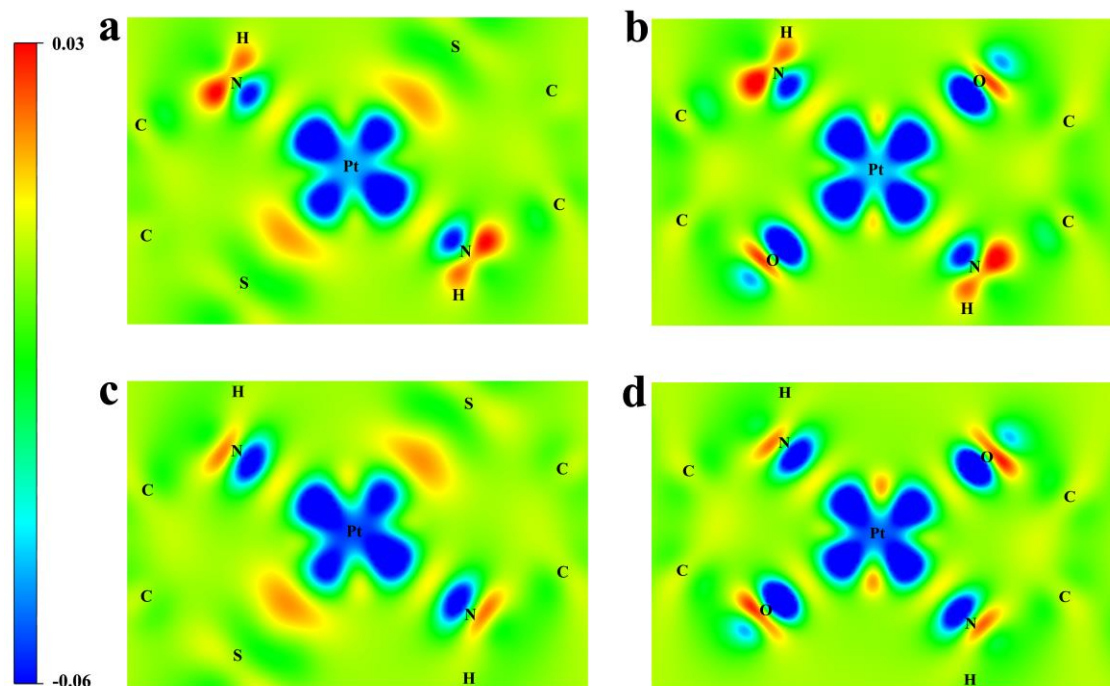

**Fig. S10** Charge density difference of *trans*-structures: (a) Pt-(NH<sub>2</sub>)S; (b) Pt-(NH<sub>2</sub>)O; (c) Pt-(NH)S; and (d) Pt-(NH)O respectively. The unit of the scale is  $e/\text{\AA}^3$ .

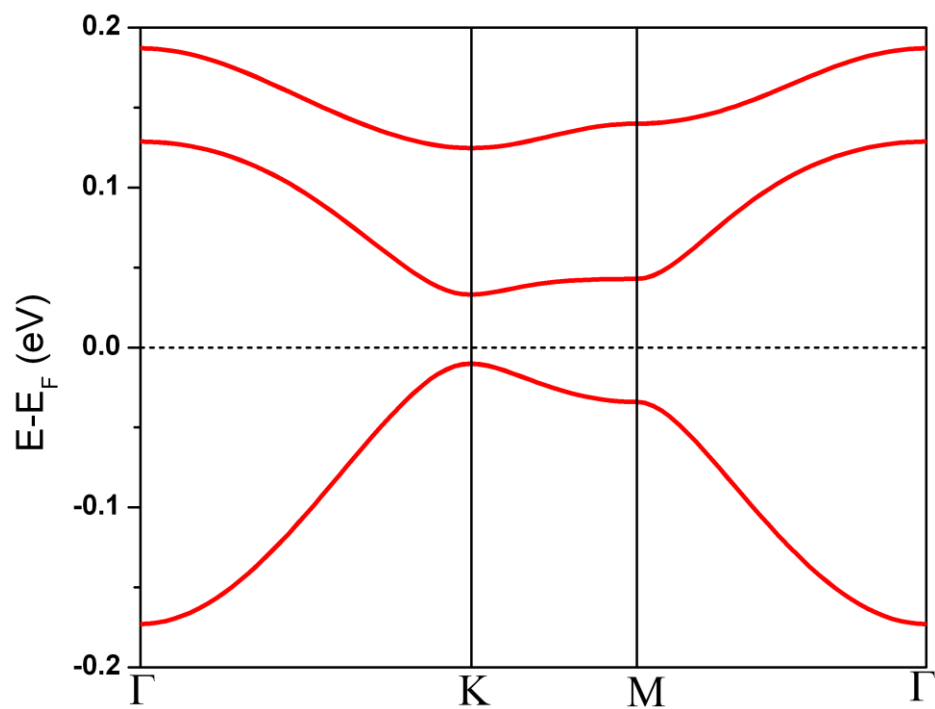

**Fig. S11** DFT calculated band structures based on Jellium Model electron-doped (two electrons per unit cell) for *trans*-Pt-(NH)S complex with SOC consideration.
